# Supplementary material for: Energetics of ice nucleation in mesoporous titania using positron annihilation spectroscopy
Source: Royal Society of Chemistry journal article supplement (doi:10.1039/c8cp06121a), 2019-01-01

## Energetics of ice nucleation in mesoporous titania using Positron annihilation spectroscopy

Muthulakshmi Thangswamy<sup>1</sup>, D. Dutta<sup>1,3</sup>, Priya Maheshwari<sup>1,3</sup>, Debasis Sen<sup>2,3</sup> and P. K. Pujari<sup>1,3</sup>

<sup>1</sup>Radiochemistry Division, Bhabha Atomic Research Centre, Mumbai-400085, India

<sup>2</sup>Solid State Physics Division, Bhabha Atomic Research Centre, Mumbai-400085, India

<sup>3</sup>Homi Bhabha National Institute, Mumbai-400085, India

\*Corresponding authors: [deep@barc.gov.in](mailto:deep@barc.gov.in); [pujari@barc.gov.in](mailto:pujari@barc.gov.in)

### Supplementary Information

**Appendix I:** The temperature dependence of o-Ps *pick-off* lifetime and intensity for different hydration levels obtained from three component fitting analysis. The positron lifetime ( $\tau_1$ ) was fixed to an average value obtained from three component analysis of the spectrum with all the parameters free.

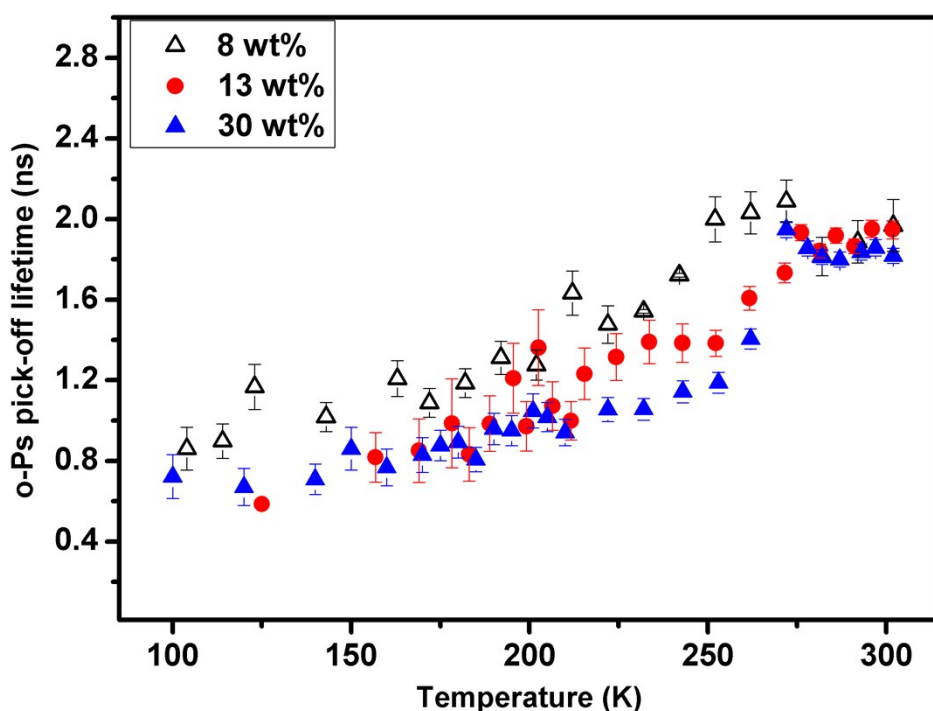

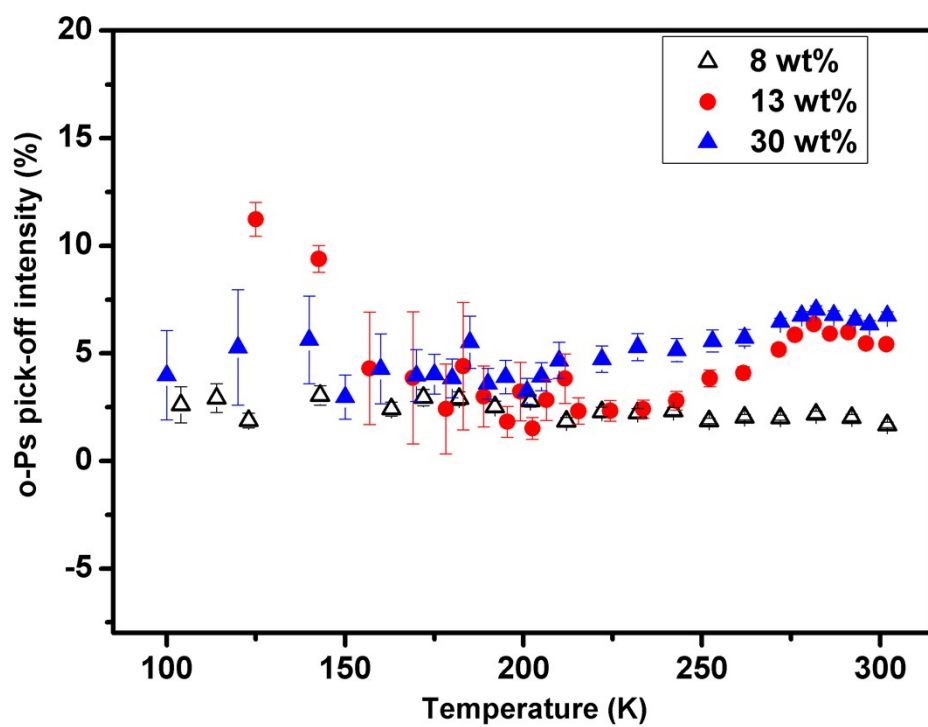

Supplement: c8cp06121a1.pdf [file c8cp06121a1.pdf]
